# Supplementary material
Source: publisher figshare collection journal article supplement (https://frontiersin.figshare.com/ndownloader/files/13640621)
Supplement: Supplementary file [file 13640621]

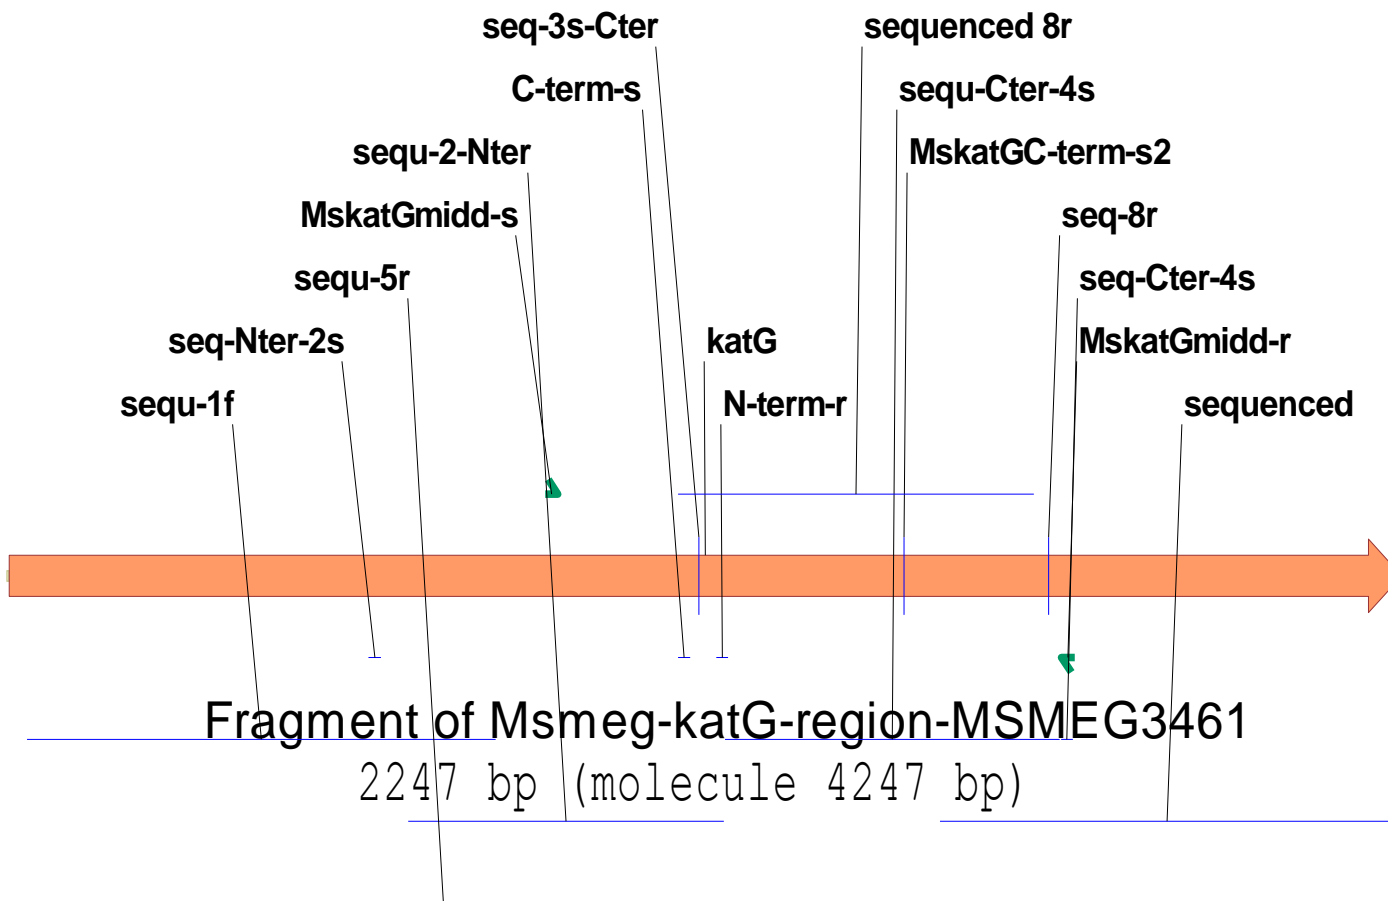

Blue lines represent the individually sequenced fragments of *msmeg\_3461*. The sequencing primers are marked above the ORF.

|                                      |       |                                                    |      |        |        |                              |          |
|--------------------------------------|-------|----------------------------------------------------|------|--------|--------|------------------------------|----------|
|                                      |       | Section 1                                          |      |        |        |                              |          |
| Msmeg-katG-coding<br>5-10-katGNter6R | (1)   | 1                                                  | 10   | 20     | 30     | 49                           |          |
|                                      | (1)   | -----                                              |      |        |        |                              |          |
|                                      | (1)   | TGGACGGCCCCCTTGATCACAGCCCACATCACCAACCACCCGGAAGGATT |      |        |        |                              |          |
|                                      |       | Section 2                                          |      |        |        |                              |          |
| Msmeg-katG-coding<br>5-10-katGNter6R | (50)  | 50                                                 | 60   | 70     | 80     | 98                           |          |
|                                      | (1)   | -----                                              | GTGT | CATCCG | ATACAT | CTGACAGCCGCCCACCCAACCCGGATAC |          |
|                                      | (50)  | TCGCT                                              | GTGT | CATCCG | ATACAT | CTGACAGCCGCCCACCCAACCCGGATAC |          |
|                                      |       | Section 3                                          |      |        |        |                              |          |
| Msmeg-katG-coding<br>5-10-katGNter6R | (99)  | 99                                                 | 110  | 120    | 130    | 147                          |          |
|                                      | (45)  | GAAGACCGCGAGCACGAGCGAGAGCGAAAACCCCGCGATCCCTTCCCCG  |      |        |        |                              |          |
|                                      | (99)  | GAAGACCGCGAGCACGAGCGAGAGCGAAAACCCCGCGATCCC         |      |        |        |                              | TCCCCG   |
|                                      |       | Section 4                                          |      |        |        |                              |          |
| Msmeg-katG-coding<br>5-10-katGNter6R | (148) | 148                                                | 160  | 170    | 180    | 196                          |          |
|                                      | (94)  | AAGCCGAAATCGGGCGCTCCGCTTCGCAACCAGGACTGGTGG         |      |        |        |                              | CCCAACC  |
|                                      | (148) | AAGCCGAAATCGGGCGCTCCGCTTCGCAACCAGGACTGGTGG         |      |        |        |                              | CCCAACC  |
|                                      |       | Section 5                                          |      |        |        |                              |          |
| Msmeg-katG-coding<br>5-10-katGNter6R | (197) | 197                                                | 210  | 220    | 230    | 245                          |          |
|                                      | (143) | AGATCGACGTATCACGCCTGCATCCGCATCCCCCGCAGGGCA         |      |        |        |                              | AACCCGCT |
|                                      | (197) | AGATCGACGTATCACGCCTGCATCCGCATCCCCCGCAGGGCA         |      |        |        |                              | AACCCGCT |
|                                      |       | Section 6                                          |      |        |        |                              |          |
| Msmeg-katG-coding<br>5-10-katGNter6R | (246) | 246                                                | 260  | 270    | 280    | 294                          |          |
|                                      | (192) | GGGCGAAGACTTCGACTACGCCGAGGAATTCGCCAAGCTCGA         |      |        |        |                              | CGTGAAC  |
|                                      | (246) | GGGCGAAGACTTCGACTACGCCGAGGAATTCGCCAAGCTCGA         |      |        |        |                              | CGTGAAC  |
|                                      |       | Section 7                                          |      |        |        |                              |          |
| Msmeg-katG-coding<br>5-10-katGNter6R | (295) | 295                                                | 300  | 310    | 320    | 330                          | 343      |
|                                      | (241) | GCGCTCAAGGCCGACCTCACGGCGCTGATGACGCAGTCCCAG         |      |        |        |                              | GACTGGT  |
|                                      | (295) | GCGCTCAAGGCCGACCTCACGGCGCTGATGACGCAGTCCCAG         |      |        |        |                              | GACTGGT  |
|                                      |       | Section 8                                          |      |        |        |                              |          |
| Msmeg-katG-coding<br>5-10-katGNter6R | (344) | 344                                                | 350  | 360    | 370    | 380                          | 392      |
|                                      | (290) | GGCCCGCCGACTACGGGCACTACGGCGGCCTGTTTCATCCGTAT       |      |        |        |                              | TGAGCTG  |
|                                      | (344) | GGCCCGCCGACTACGGGCACTACGGCGGCCTGTTTCATCCGTAT       |      |        |        |                              | TGAGCTG  |
|                                      |       | Section 9                                          |      |        |        |                              |          |
| Msmeg-katG-coding<br>5-10-katGNter6R | (393) | 393                                                | 400  | 410    | 420    | 430                          | 441      |
|                                      | (339) | GCACTCGGCAGGCACCTACCGCATCCATGACGGCCGCGGGGGCGGGCGGG |      |        |        |                              |          |
|                                      | (393) | GCACTCGGCAGGCACCTACCGCATCCATGACGGCCGCGGGGGCGGGCGGG |      |        |        |                              |          |

# Untitled

|                   |       |                                                    |     |      |     |     |                 |
|-------------------|-------|----------------------------------------------------|-----|------|-----|-----|-----------------|
|                   |       | Section 10                                         |     |      |     |     |                 |
|                   | (442) | 442                                                | 450 | 460  | 470 | 480 | 490             |
| Msmeg-katG-coding | (388) | CAGGGCGCCCAACGGTTCGCACCGATCAACTCGTGGCCCGACAACGTCA  |     |      |     |     |                 |
| 5-10-katGNter6R   | (442) | CAGGGCGCCCAACGGTTCGCACCGATCAACTCGTGGCCCGACAACGTCA  |     |      |     |     |                 |
|                   |       | Section 11                                         |     |      |     |     |                 |
|                   | (491) | 491                                                | 500 | 510  | 520 |     | 539             |
| Msmeg-katG-coding | (437) | GCCTGGACAAGGCCAGAAGACTGTTGTGGCCCATCA               |     |      |     |     | AA GT           |
| 5-10-katGNter6R   | (491) | GCCTGGACAAGGCCAGAAGACTGTTGTGGCCCATCA               |     |      |     |     | GCAG TCTT AA TA |
|                   |       | Section 12                                         |     |      |     |     |                 |
|                   | (540) | 540                                                | 550 | 560  | 570 |     | 588             |
| Msmeg-katG-coding | (482) | AC                                                 | GC  | AACA | AG  | AT  | CT              |
| 5-10-katGNter6R   | (539) | AC                                                 | GC  | CTAK | AG  | GT  | TT              |
|                   |       | Section 13                                         |     |      |     |     |                 |
|                   | (589) | 589                                                | 600 | 610  | 620 |     | 637             |
| Msmeg-katG-coding | (531) | GGCTTTGGAATCCATGGGCTTCAAGACGTTTGGCTTCGGCTTCGGCCGC  |     |      |     |     |                 |
| 5-10-katGNter6R   | (554) | -----                                              |     |      |     |     |                 |
|                   |       | Section 14                                         |     |      |     |     |                 |
|                   | (638) | 638                                                | 650 | 660  | 670 |     | 686             |
| Msmeg-katG-coding | (580) | GAGGACATCTGGGAGCCAGAGGAGATCCTGTTGCGGAGGAAGACGAAT   |     |      |     |     |                 |
| 5-10-katGNter6R   | (554) | -----                                              |     |      |     |     |                 |
|                   |       | Section 15                                         |     |      |     |     |                 |
|                   | (687) | 687                                                | 700 | 710  | 720 |     | 735             |
| Msmeg-katG-coding | (629) | GGCTGGGCACCGACAAGCGGTACGGCGGCGGCGAGCAGCGCCAACTCGC  |     |      |     |     |                 |
| 5-10-katGNter6R   | (554) | -----                                              |     |      |     |     |                 |
|                   |       | Section 16                                         |     |      |     |     |                 |
|                   | (736) | 736                                                | 750 | 760  | 770 |     | 784             |
| Msmeg-katG-coding | (678) | CGAACCGTACGGTGCACACGATGGGCCTGATCTACGTCAACCCCGAA    |     |      |     |     |                 |
| 5-10-katGNter6R   | (554) | -----                                              |     |      |     |     |                 |
|                   |       | Section 17                                         |     |      |     |     |                 |
|                   | (785) | 785                                                | 790 | 800  | 810 | 820 | 833             |
| Msmeg-katG-coding | (727) | GGCCCGGAGGGTCAACCCGACCCGCTCGCCGCGGCACACGACATCCGCG  |     |      |     |     |                 |
| 5-10-katGNter6R   | (554) | -----                                              |     |      |     |     |                 |
|                   |       | Section 18                                         |     |      |     |     |                 |
|                   | (834) | 834                                                | 840 | 850  | 860 | 870 | 882             |
| Msmeg-katG-coding | (776) | AGACGTTTCGGCCGCATGGCGATGAACGACGAGGAGACCGCGGCGCTGAT |     |      |     |     |                 |
| 5-10-katGNter6R   | (554) | -----                                              |     |      |     |     |                 |

Untitled

Section 1

|                   |     |                             |    |    |    |    |
|-------------------|-----|-----------------------------|----|----|----|----|
|                   | (1) | 1                           | 10 | 20 | 30 | 49 |
| Msmeg-katG-coding | (1) | GTGTCATCCGATACATCTGACAGCCGC |    |    |    |    |
| 5-10-katGNter1    | (1) | -----GCGGGCCCGCCG           |    |    |    |    |
| 5-10-katGNter2    | (1) | -----                       |    |    |    |    |
| 5-10-katGNter5R   | (1) | -----ARTC                   |    |    |    |    |

Section 2

|                   |      |                                                   |    |    |    |    |
|-------------------|------|---------------------------------------------------|----|----|----|----|
|                   | (50) | 50                                                | 60 | 70 | 80 | 98 |
| Msmeg-katG-coding | (50) | CCGCGAGCACGAGCGAGAGCGAAAACCCCGCGATCCCTTCCC        |    |    |    |    |
| 5-10-katGNter1    | (36) | CCGCGAGCACGAGCGAGAGCGAAAACCCCGCGATCCCTTCCCCGAAGCC |    |    |    |    |
| 5-10-katGNter2    | (1)  | -----                                             |    |    |    |    |
| 5-10-katGNter5R   | (5)  | GAGCGGGAACGACGAGACGAA-----CCC                     |    |    |    |    |

Section 3

|                   |      |                                                              |     |     |     |     |
|-------------------|------|--------------------------------------------------------------|-----|-----|-----|-----|
|                   | (99) | 99                                                           | 110 | 120 | 130 | 147 |
| Msmeg-katG-coding | (99) | GAAATCGGGCGCTCCGCTTCGCAACCAGGACTGGTGGCCCAACCAGATC            |     |     |     |     |
| 5-10-katGNter1    | (85) | RGAATCGGGCGCTCCGCTTCGCAACCAGGACTGGTGGCCCAACCAGATC            |     |     |     |     |
| 5-10-katGNter2    | (1)  | -----                                                        |     |     |     |     |
| 5-10-katGNter5R   | (45) | GAA--TCGT--CGTTC--GCTG--GCAAC--A--GACTGA--TAAGCC--AA--CAGATC |     |     |     |     |

Section 4

|                   |       |                                                        |     |     |     |     |
|-------------------|-------|--------------------------------------------------------|-----|-----|-----|-----|
|                   | (148) | 148                                                    | 160 | 170 | 180 | 196 |
| Msmeg-katG-coding | (148) | GACGTATCACGCCTGCATCCGCATCCCCCGCAGGGCAACCCGCTGGGCG      |     |     |     |     |
| 5-10-katGNter1    | (134) | GACGTATCACGCCTGCATCCGCATCCCCCGCAGGGCAACCCGCTGGGCG      |     |     |     |     |
| 5-10-katGNter2    | (1)   | -----                                                  |     |     |     |     |
| 5-10-katGNter5R   | (86)  | GACGTATCACGC--TGCATTCGCATCCCC--GCAGACCA--TCC--GCTGRGCG |     |     |     |     |

Section 5

|                   |       |                                                    |     |     |     |     |
|-------------------|-------|----------------------------------------------------|-----|-----|-----|-----|
|                   | (197) | 197                                                | 210 | 220 | 230 | 245 |
| Msmeg-katG-coding | (197) | AA--GACTTCGACTACGCCGAGGAATTCGCCAAGCTCGACGTGAACGCGC |     |     |     |     |
| 5-10-katGNter1    | (183) | AA--GACTTCGACTACGCCGAGGAATTCGCCAAGCTCGACGTGAACGCGC |     |     |     |     |
| 5-10-katGNter2    | (1)   | -----                                              |     |     |     |     |
| 5-10-katGNter5R   | (132) | AAAGACTTCGACTACGCCGAAGAATTCGCCAAGCTCGACGTGAACGCGC  |     |     |     |     |

Section 6

|                   |       |                                                     |     |     |     |     |
|-------------------|-------|-----------------------------------------------------|-----|-----|-----|-----|
|                   | (246) | 246                                                 | 260 | 270 | 280 | 294 |
| Msmeg-katG-coding | (245) | TCAAGG--CCGACCTCACGGCGCTGATGACGCAGTCCCA--GGACTGGTGG |     |     |     |     |
| 5-10-katGNter1    | (231) | TCAAGG--CCGACCTCACGGCGCTGATGACGCAGTCCCA--GGACTGGTGG |     |     |     |     |
| 5-10-katGNter2    | (1)   | -----                                               |     |     |     |     |
| 5-10-katGNter5R   | (181) | TCAAAGAGCCGACCTCACGGCGCTGATGACGCAGTCCCAAGGACTGT--G  |     |     |     |     |

Section 7

|                   |       |                                                     |     |     |     |     |     |
|-------------------|-------|-----------------------------------------------------|-----|-----|-----|-----|-----|
|                   | (295) | 295                                                 | 300 | 310 | 320 | 330 | 343 |
| Msmeg-katG-coding | (292) | CCCGCCGACTACGGGCACTACGGCGGCCTGTTTCATCCGTATGAGCTGGC  |     |     |     |     |     |
| 5-10-katGNter1    | (278) | CCCGCCGACTACGGGCACTACGGCGGCCTGTTTCATCCGTATGAGCTGGC  |     |     |     |     |     |
| 5-10-katGNter2    | (1)   | -----                                               |     |     |     |     |     |
| 5-10-katGNter5R   | (228) | TCCGC--GACTACRRGCACTACRGCRGCCTGTTTCATCCGTATGAGCTGGC |     |     |     |     |     |

Section 8

|                   |       |                                                   |     |     |     |     |     |
|-------------------|-------|---------------------------------------------------|-----|-----|-----|-----|-----|
|                   | (344) | 344                                               | 350 | 360 | 370 | 380 | 392 |
| Msmeg-katG-coding | (341) | ACTCGGCAGGCACCTACCGCATCCATGACGGCCGCGGGGGCGGCGGGCA |     |     |     |     |     |
| 5-10-katGNter1    | (327) | ACTCGGCAGGCACCTACCGCATCCATGACGGCCGCGGGGGCGGCGGGCA |     |     |     |     |     |
| 5-10-katGNter2    | (1)   | -----                                             |     |     |     |     |     |
| 5-10-katGNter5R   | (276) | ACTCGGCAGGCACCTACCGCATCCATGACGGCCGCGGGGGCGGCGGGCA |     |     |     |     |     |

Section 9

|                   |       |                                                                    |     |     |     |     |     |
|-------------------|-------|--------------------------------------------------------------------|-----|-----|-----|-----|-----|
|                   | (393) | 393                                                                | 400 | 410 | 420 | 430 | 441 |
| Msmeg-katG-coding | (390) | GGGCGCCCCAACGGTTTCGCACCGATCAACTCGTGGCCCCGACAAACGTCAGC              |     |     |     |     |     |
| 5-10-katGNter1    | (376) | GGGCGCCCCAACGGTTTCGCACCGATCAACTCGTGGCCCCGACAAACGTCAGC              |     |     |     |     |     |
| 5-10-katGNter2    | (1)   | -----                                                              |     |     |     |     |     |
| 5-10-katGNter5R   | (325) | G <sup>R</sup> CGGCCCCAACGGTTTCGCACCGATCAACTCGTGGCCCCGACAAACGTCAGC |     |     |     |     |     |

Section 10

|                   |       |                                                   |     |     |     |     |     |
|-------------------|-------|---------------------------------------------------|-----|-----|-----|-----|-----|
|                   | (442) | 442                                               | 450 | 460 | 470 | 480 | 490 |
| Msmeg-katG-coding | (439) | CTGGACAAGGCCAGAAGACTGTTGTGGCCCATCAAGCAGAAGTACGGCA |     |     |     |     |     |
| 5-10-katGNter1    | (425) | CTGGACAAGGCCAGAAGACTGTTGTGGCCCATCAAGCAGAAGTACGGCA |     |     |     |     |     |
| 5-10-katGNter2    | (1)   | -----                                             |     |     |     |     |     |
| 5-10-katGNter5R   | (374) | CTGGACAAGGCCAGAAGACTGTTGTGGCCCATCAAGCAGAAGTACGGCA |     |     |     |     |     |

Section 11

|                   |       |                                                  |     |     |     |     |
|-------------------|-------|--------------------------------------------------|-----|-----|-----|-----|
|                   | (491) | 491                                              | 500 | 510 | 520 | 539 |
| Msmeg-katG-coding | (488) | ACAAGATCTCCTGGGCCGATCTTCTGGTGTTACCGGCAACGTGGCTTT |     |     |     |     |
| 5-10-katGNter1    | (474) | ACAAGATCTCCTGGGCCGATCTTCTGGTGTTACCGGCAACGTGGCTTT |     |     |     |     |
| 5-10-katGNter2    | (1)   | -----                                            |     |     |     |     |
| 5-10-katGNter5R   | (423) | ACAAGATCTCCTGGGCCGATCTTCTGGTGTTACCGGCAACGTGGCTTT |     |     |     |     |

Section 12

|                   |       |                                                   |     |     |     |     |
|-------------------|-------|---------------------------------------------------|-----|-----|-----|-----|
|                   | (540) | 540                                               | 550 | 560 | 570 | 588 |
| Msmeg-katG-coding | (537) | GGAATCCATGGGCTTCAAGACGTTTGGCTTCGGCTTCGGCCGCGAGGAC |     |     |     |     |
| 5-10-katGNter1    | (523) | GGAATCCATGGGCTTCAAGACGTTTGGCTTCGGCTTCGGCCGCGAGGAC |     |     |     |     |
| 5-10-katGNter2    | (1)   | -----                                             |     |     |     |     |
| 5-10-katGNter5R   | (472) | GGAATCCATGGGCTTCAAGACGTTTGGCTTCGGCTTCGGCCGCGAGGAC |     |     |     |     |

Section 13

|                   |       |                                                                                                       |     |     |     |     |
|-------------------|-------|-------------------------------------------------------------------------------------------------------|-----|-----|-----|-----|
|                   | (589) | 589                                                                                                   | 600 | 610 | 620 | 637 |
| Msmeg-katG-coding | (586) | ATCTGGGAGCCAGAGGAGATCCTGTT <sup>CGG</sup> <sup>CGA</sup> <sup>GGAA</sup> <sup>GACGA</sup> -ATGGCTG    |     |     |     |     |
| 5-10-katGNter1    | (572) | ATCTGGGAGCCAGAGGAGATCCTGTT <sup>CGG</sup> <sup>CGA</sup> <sup>GGAA</sup> <sup>GACGA</sup> -ATGGCTG    |     |     |     |     |
| 5-10-katGNter2    | (1)   | -----A <sup>CGG</sup> <sup>TA</sup> <sup>CKGS</sup> <sup>G</sup> <sup>GT</sup> <sup>GCG</sup> ATGGCTG |     |     |     |     |
| 5-10-katGNter5R   | (521) | ATCTGGGAGCCAGAGGAGATCCTGTT <sup>CGG</sup> <sup>CGA</sup> <sup>GGAA</sup> <sup>GACGA</sup> -ATGGCTG    |     |     |     |     |

Section 14

|                   |       |                                                                |     |     |     |     |
|-------------------|-------|----------------------------------------------------------------|-----|-----|-----|-----|
|                   | (638) | 638                                                            | 650 | 660 | 670 | 686 |
| Msmeg-katG-coding | (634) | GGCACCGACA <sup>A</sup> GCGGTACGGCGGCGGCGAGCAGCGCCAACTCGCCGAAC |     |     |     |     |
| 5-10-katGNter1    | (620) | GGCACCGACA <sup>A</sup> GCGGTACGGCGGCGGCGAGCAGCGCCAACTCGCCGAAC |     |     |     |     |
| 5-10-katGNter2    | (25)  | GGCACCGACA-GCGGTACGGCGGCGGCGAGCAGCGCCAACTCGCCGAAC              |     |     |     |     |
| 5-10-katGNter5R   | (569) | GGCACCGACA <sup>A</sup> GCGGTACGGCGGCGGCGAGCAGCGCCAACTCGCCGAAC |     |     |     |     |

Section 15

|                   |       |                                                    |     |     |     |     |
|-------------------|-------|----------------------------------------------------|-----|-----|-----|-----|
|                   | (687) | 687                                                | 700 | 710 | 720 | 735 |
| Msmeg-katG-coding | (683) | CGTACGGTGCGACCACGATGGGCCTGATCTACGTCAACCCCGAAGGCCCG |     |     |     |     |
| 5-10-katGNter1    | (669) | CGTACGGTGCGACCACGATGGGCCTGATCTACGTCAACCCCGAAGGCCCG |     |     |     |     |
| 5-10-katGNter2    | (73)  | CGTACGGTGCGACCACGATGGGCCTGATCTACGTCAACCCCGAAGGCCCG |     |     |     |     |
| 5-10-katGNter5R   | (618) | CGTACGGTGCGACCACGATGGGCCTGATCTACGTCAACCCCGAAGGCCCG |     |     |     |     |

Section 16

|                   |       |                                                   |     |     |     |     |
|-------------------|-------|---------------------------------------------------|-----|-----|-----|-----|
|                   | (736) | 736                                               | 750 | 760 | 770 | 784 |
| Msmeg-katG-coding | (732) | GGAGGGTCAACCCGACCCGCTCGCCGCGGCACACGACATCCGCGAGACG |     |     |     |     |
| 5-10-katGNter1    | (718) | GGAGGGTCAACCCGACCCGCTCGCCGCGGCACACGACATCCGCGAGACG |     |     |     |     |
| 5-10-katGNter2    | (122) | GGAGGGTCAACCCGACCCGCTCGCCGCGGCACACGACATCCGCGAGACG |     |     |     |     |
| 5-10-katGNter5R   | (667) | GGAGGGTCAACCCGACCCGCTCGCCGCGGCACACGACATCCGCGAGACG |     |     |     |     |

Section 17

|                   |       |       |                                |        |        |     |     |
|-------------------|-------|-------|--------------------------------|--------|--------|-----|-----|
|                   | (785) | 785   | 790                            | 800    | 810    | 820 | 833 |
| Msmeg-katG-coding | (781) | TTCGG | CGCATGGCGATGAACGACGAGGAGACCGCG | CGCTG  | GATCGT | CG  |     |
| 5-10-katGNter1    | (767) | TTCGG | CGCATGGCGATGAACGACGAGGAGACCGCG | -CGCTG | GATCGT | CG  |     |
| 5-10-katGNter2    | (171) | TTCGG | CGCATGGCGATGAACGACGAGGAGACCGCG | CGCTG  | GATCGT | CG  |     |
| 5-10-katGNter5R   | (716) | TTCGG | CGCATGGCGATGAACGACGAGGAGACCGCG | CGCTG  | GATCGT | CG  |     |

Section 18

|                   |       |     |                               |           |      |       |     |
|-------------------|-------|-----|-------------------------------|-----------|------|-------|-----|
|                   | (834) | 834 | 840                           | 850       | 860  | 870   | 882 |
| Msmeg-katG-coding | (830) | GCG | GGCACACGTTTCGGCAAGACCCACGGCGC | GCGCATGC  | AGC  | TCGT  |     |
| 5-10-katGNter1    | (815) | C-- | GGCACACGTTTCGGCAAGACCCACGGCGC | -GCGCATGC | -AGC | YTCGT |     |
| 5-10-katGNter2    | (220) | GCG | GGCACACGTTTCGGCAAGACCCACGGCGC | GCGCATGC  | AGC  | TCGT  |     |
| 5-10-katGNter5R   | (765) | GCG | GGCACACGTTTCGGCAAGACCCACGGCGC | GCGCATGC  | AGC  | TCGT  |     |

Section 19

|                   |       |        |       |       |     |        |                            |
|-------------------|-------|--------|-------|-------|-----|--------|----------------------------|
|                   | (883) | 883    | 890   | 900   | 910 | 920    | 931                        |
| Msmeg-katG-coding | (879) | CGGTCC | GAGC  | CGAG  | GC  | GAC    | GATCGAGCAGCAAGGTCTCGGCTGG  |
| 5-10-katGNter1    | (860) | CGGTCC | -GAGC | YCGAG | T   | C-GCAC | -GATCGAGCAGCAAGA-CTCG-CTG- |
| 5-10-katGNter2    | (269) | CGGTCC | GAGC  | CGAG  | GC  | GAC    | GATCGAGCAGCAAGGTCTCGGCTGG  |
| 5-10-katGNter5R   | (814) | CGGTCC | GAGC  | CGAG  | GC  | GAC    | GATCGAGCAGCAAGGTCTCGGCTGG  |

Section 20

|                   |       |           |       |         |         |       |                |
|-------------------|-------|-----------|-------|---------|---------|-------|----------------|
|                   | (932) | 932       | 940   | 950     | 960     | 970   | 980            |
| Msmeg-katG-coding | (928) | AAGAGTTC  | CTACG | GACACGG | CAAGGGT | CCGAC | ACCA           |
| 5-10-katGNter1    | (903) | -AAGAGTTC | -TACG | -CACGG  | -CAA    | --GT  | TCCGAC-----TCA |
| 5-10-katGNter2    | (318) | AAGAGTTC  | CTACG | GACACGG | CAAGGGT | CCGAC | ACCA           |
| 5-10-katGNter5R   | (863) | AAGAGTTC  | CTACG | GACACGG | CAAGGGT | CCGAC | ACCA           |

Section 21

|                   | (981) | 981 | 990 | 1000     | 1010 | 1029 |     |      |      |      |      |     |      |     |     |      |
|-------------------|-------|-----|-----|----------|------|------|-----|------|------|------|------|-----|------|-----|-----|------|
| Msmeg-katG-coding | (977) | TG  | GAG | TCGTGTG  | GACC | AACA | CAC | CGAC | CA   | AGTG | GG   | ACA | AACA | GCT | TC  | CT   |
| 5-10-katGNter1    | (942) | TG  | -AG | ATCGTGTG | ---- | A    | -CA | ACT  | CGAC | --   | AGTG | --  | ACA  | -CA | GCT | --CT |
| 5-10-katGNter2    | (367) | TG  | GAG | TCGTGTG  | GACC | AACA | CAC | CGAC | CA   | AGTG | GG   | ACA | AACA | GCT | TC  | CT   |
| 5-10-katGNter5R   | (912) | TG  | GAG | TCGTGTG  | GACC | AACA | CAC | CGAC | CA   | AGTG | GG   | ACA | AACA | GCT | TC  | CT   |

Section 22

|                          |        |                                           |  |      |  |      |  |      |  |           |
|--------------------------|--------|-------------------------------------------|--|------|--|------|--|------|--|-----------|
|                          | (1030) | 1030                                      |  | 1040 |  | 1050 |  | 1060 |  | 1078      |
| Msmeg-katG-coding (1026) |        | GGAGATCCTCTACGGCTACGAGTGGGAGCTGACCAAAGAGC |  |      |  |      |  |      |  | CCGGCCGGC |
| 5-10-katGNter1 (978)     |        | GA--ATCCT-TACG-CTAC-AGATGAAGCTGACTA-GAGC  |  |      |  |      |  |      |  | -----     |
| 5-10-katGNter2 (416)     |        | GGAGATCCTCTACGGCTACGAGTGGGAGCTGACCAAAGAGC |  |      |  |      |  |      |  | CCGGCCGGC |
| 5-10-katGNter5R (961)    |        | GGAGATCCTCTACGGCTACGAGTGGGAGCTGACCAAAGAGC |  |      |  |      |  |      |  | CCGGCCGGC |

Section 23

|                          |        |                                            |  |      |  |      |  |      |  |            |
|--------------------------|--------|--------------------------------------------|--|------|--|------|--|------|--|------------|
|                          | (1079) | 1079                                       |  | 1090 |  | 1100 |  | 1110 |  | 1127       |
| Msmeg-katG-coding (1075) |        | GCCTGGCAGTTCACCGCGAAGGACGGGGCAGGCGCGGGCACC |  |      |  |      |  |      |  | ATCCCGG    |
| 5-10-katGNter1 (1012)    |        | -----                                      |  |      |  |      |  |      |  | -----      |
| 5-10-katGNter2 (465)     |        | GCCTGGCAGTTCACCGCGAAGGACGGGGCAGGCGCGGGCACC |  |      |  |      |  |      |  | ATCCCGG    |
| 5-10-katGNter5R (1010)   |        | GCCTGGCAGT-CACCGCGAARM                     |  |      |  |      |  |      |  | AAWAC----- |

Section 24

|                          |        |                                   |  |      |  |      |  |      |  |                    |
|--------------------------|--------|-----------------------------------|--|------|--|------|--|------|--|--------------------|
|                          | (1128) | 1128                              |  | 1140 |  | 1150 |  | 1160 |  | 1176               |
| Msmeg-katG-coding (1124) |        | ATCCGTTTCGGCGGGCCAGGACGCAACCCGAC  |  |      |  |      |  |      |  | CATGCTGGTCACCGACAT |
| 5-10-katGNter1 (1012)    |        | -----                             |  |      |  |      |  |      |  | -----              |
| 5-10-katGNter2 (514)     |        | ATCCGTTTCGGCGGGCCAGGACGCAACCCGAMC |  |      |  |      |  |      |  | CATGCTA-----       |
| 5-10-katGNter5R (1037)   |        | -----                             |  |      |  |      |  |      |  | -----              |

Section 25

|                          |        |                                                   |  |      |  |      |  |      |  |       |
|--------------------------|--------|---------------------------------------------------|--|------|--|------|--|------|--|-------|
|                          | (1177) | 1177                                              |  | 1190 |  | 1200 |  | 1210 |  | 1225  |
| Msmeg-katG-coding (1173) |        | CTCGATGCGCGTGGACCCGATCTACGGGAAGATCACGCGCCGGTGGCTC |  |      |  |      |  |      |  |       |
| 5-10-katGNter1 (1012)    |        | -----                                             |  |      |  |      |  |      |  | ----- |
| 5-10-katGNter2 (553)     |        | -----                                             |  |      |  |      |  |      |  | ----- |
| 5-10-katGNter5R (1037)   |        | -----                                             |  |      |  |      |  |      |  | ----- |

Section 26

|                          |        |                                                    |  |      |  |      |  |      |  |       |
|--------------------------|--------|----------------------------------------------------|--|------|--|------|--|------|--|-------|
|                          | (1226) | 1226                                               |  | 1240 |  | 1250 |  | 1260 |  | 1274  |
| Msmeg-katG-coding (1222) |        | GACCATCCCAGAGGAGCTCTCGGAGGCCTTCGCGAAGGCCTGGTACAAGC |  |      |  |      |  |      |  |       |
| 5-10-katGNter1 (1012)    |        | -----                                              |  |      |  |      |  |      |  | ----- |
| 5-10-katGNter2 (553)     |        | -----                                              |  |      |  |      |  |      |  | ----- |
| 5-10-katGNter5R (1037)   |        | -----                                              |  |      |  |      |  |      |  | ----- |

Section 27

|                          |        |                                                   |  |      |  |      |  |      |  |      |  |       |
|--------------------------|--------|---------------------------------------------------|--|------|--|------|--|------|--|------|--|-------|
|                          | (1275) | 1275                                              |  | 1280 |  | 1290 |  | 1300 |  | 1310 |  | 1323  |
| Msmeg-katG-coding (1271) |        | TGCTGCACCGCGACATGGGACCGATCTCGCGGTATCTGGGGCCCTGGGT |  |      |  |      |  |      |  |      |  |       |
| 5-10-katGNter1 (1012)    |        | -----                                             |  |      |  |      |  |      |  |      |  | ----- |
| 5-10-katGNter2 (553)     |        | -----                                             |  |      |  |      |  |      |  |      |  | ----- |
| 5-10-katGNter5R (1037)   |        | -----                                             |  |      |  |      |  |      |  |      |  | ----- |

Section 28

|                          |        |                                                    |  |      |  |      |  |      |  |      |  |       |
|--------------------------|--------|----------------------------------------------------|--|------|--|------|--|------|--|------|--|-------|
|                          | (1324) | 1324                                               |  | 1330 |  | 1340 |  | 1350 |  | 1360 |  | 1372  |
| Msmeg-katG-coding (1320) |        | CGCCGAACCGCAGCTGTGGCAGGACCCGGTCCCGGCGGTTCGATCATCCG |  |      |  |      |  |      |  |      |  |       |
| 5-10-katGNter1 (1012)    |        | -----                                              |  |      |  |      |  |      |  |      |  | ----- |
| 5-10-katGNter2 (553)     |        | -----                                              |  |      |  |      |  |      |  |      |  | ----- |
| 5-10-katGNter5R (1037)   |        | -----                                              |  |      |  |      |  |      |  |      |  | ----- |

|                      |        |                                                   |               |                                               |                |                                 |      |
|----------------------|--------|---------------------------------------------------|---------------|-----------------------------------------------|----------------|---------------------------------|------|
|                      |        | Section 25                                        |               |                                               |                |                                 |      |
|                      | (1153) | 1153                                              | 1160          | 1170                                          | 1180           | 1190                            | 1200 |
| Msmeg-katG-coding    | (1153) | A                                                 | C             | ATGCTGGTCACCGACATCTCGATGCGCGTGGACCCGATCTACGGG |                |                                 |      |
| 5-10-katG-Cterm-1-8R | (1)    | -----                                             |               |                                               |                |                                 |      |
| 5-10-katG-Cterm-3s   | (12)   | M                                                 | C             | A                                             | ATGCTGGTCACCGA | CATCTCGATGCGCGTGGACCCGATCTACGGG |      |
|                      |        | Section 26                                        |               |                                               |                |                                 |      |
|                      | (1201) | 1201                                              | 1210          | 1220                                          | 1230           | 1248                            |      |
| Msmeg-katG-coding    | (1201) | AAGATCACGCGCCGGTGGCTCGACCATCCCGAGGAGCTCTCGGAGGCC  |               |                                               |                |                                 |      |
| 5-10-katG-Cterm-1-8R | (1)    | -----                                             |               |                                               |                |                                 |      |
| 5-10-katG-Cterm-3s   | (60)   | AAGATCACGCGCCGGTGGCTCGACCATCCCGAGGAGCTCTCGGAGGCC  |               |                                               |                |                                 |      |
|                      |        | Section 27                                        |               |                                               |                |                                 |      |
|                      | (1249) | 1249                                              | 1260          | 1270                                          | 1280           | 1296                            |      |
| Msmeg-katG-coding    | (1249) | TTCGCGAAGGCCTGGTACAAGCTGCTGCACCGCGACATGGGACCGATC  |               |                                               |                |                                 |      |
| 5-10-katG-Cterm-1-8R | (1)    | -----                                             |               |                                               |                |                                 |      |
| 5-10-katG-Cterm-3s   | (108)  | TTCGCGAAGGCCTGGTACAAGCTGCTGCACCGCGACATGGGACCGATC  |               |                                               |                |                                 |      |
|                      |        | Section 28                                        |               |                                               |                |                                 |      |
|                      | (1297) | 1297                                              | 1310          | 1320                                          | 1330           | 1344                            |      |
| Msmeg-katG-coding    | (1297) | TCGCGGTATCTGGGGCCCTGGGTCGCCGAACCGCAGCTGTGGCAGGAC  |               |                                               |                |                                 |      |
| 5-10-katG-Cterm-1-8R | (1)    | -----                                             |               |                                               |                |                                 |      |
| 5-10-katG-Cterm-3s   | (156)  | TCGCGGTATCTGGGGCCCTGGGTCGCCGAACCGCAGCTGTGGCAGGAC  |               |                                               |                |                                 |      |
|                      |        | Section 29                                        |               |                                               |                |                                 |      |
|                      | (1345) | 1345                                              | 1350          | 1360                                          | 1370           | 1380                            | 1392 |
| Msmeg-katG-coding    | (1345) | CCGGTCCCGGCGGTTCGATCATCCGCTGGTCGACGACCAGGACATCGCC |               |                                               |                |                                 |      |
| 5-10-katG-Cterm-1-8R | (1)    | -----                                             |               |                                               |                |                                 |      |
| 5-10-katG-Cterm-3s   | (204)  | CCGGTCCCGGCGGTTCGATCATCCGCTGGTCGACGACCAGGACATCGCC |               |                                               |                |                                 |      |
|                      |        | Section 30                                        |               |                                               |                |                                 |      |
|                      | (1393) | 1393                                              | 1400          | 1410                                          | 1420           | 1430                            | 1440 |
| Msmeg-katG-coding    | (1393) | GCGCTGAAGTCCACGGTGCTCGATTCCGGGCTGTCGACGGGACAAC TG |               |                                               |                |                                 |      |
| 5-10-katG-Cterm-1-8R | (1)    | -----                                             |               |                                               |                |                                 |      |
| 5-10-katG-Cterm-3s   | (252)  | GCGCTGAAGTCCACGGTGCTCGATTCCGGGCTGTCGACGGGACAAC TG |               |                                               |                |                                 |      |
|                      |        | Section 31                                        |               |                                               |                |                                 |      |
|                      | (1441) | 1441                                              | 1450          | 1460                                          | 1470           | 1488                            |      |
| Msmeg-katG-coding    | (1441) | ATCA                                              | AGACTGCGTGGGC | GTCGGCGGCGAGCTACCGCAACACCGACAAG               |                |                                 |      |
| 5-10-katG-Cterm-1-8R | (1)    | ----                                              | AGACTGCGTGGGC | GTCGGCGGCGAGCTACCGCAACACCGACAAG               |                |                                 |      |
| 5-10-katG-Cterm-3s   | (300)  | ATCA                                              | AGACTGCGTGGGC | GTCGGCGGCGAGCTACCGCAACACCGACAAG               |                |                                 |      |
|                      |        | Section 32                                        |               |                                               |                |                                 |      |
|                      | (1489) | 1489                                              | 1500          | 1510                                          | 1520           | 1536                            |      |
| Msmeg-katG-coding    | (1489) | CGCGGCGGCGCCAAACGGGGCCCGGGTGCGTCTGGAACCGCAGAAGAAC |               |                                               |                |                                 |      |
| 5-10-katG-Cterm-1-8R | (45)   | CGCGGCGGCGCCAAACGGGGCCCGGGTGCGTCTGGAACCGCAGAAGAAC |               |                                               |                |                                 |      |
| 5-10-katG-Cterm-3s   | (348)  | CGCGGCGGCGCCAAACGGGGCCCGGGTGCGTCTGGAACCGCAGAAGAAC |               |                                               |                |                                 |      |



Section 33

|                      |        |                                                  |      |      |      |      |
|----------------------|--------|--------------------------------------------------|------|------|------|------|
|                      | (1537) | 1537                                             | 1550 | 1560 | 1570 | 1584 |
| Msmeg-katG-coding    | (1537) | TGGGACGTCAACGAACCGGCCGAACTGGCCACGGTGCTGCCGGTGCTC |      |      |      |      |
| 5-10-katG-Cterm-1-8R | (93)   | TGGGACGTCAACGAACCGGCCGAACTGGCCACGGTGCTGCCGGTGCTC |      |      |      |      |
| 5-10-katG-Cterm-3s   | (396)  | TGGGACGTCAACGAACCGGCCGAACTGGCCACGGTGCTGCCGGTGCTC |      |      |      |      |

Section 34

|                      |        |                                                  |      |      |      |      |      |
|----------------------|--------|--------------------------------------------------|------|------|------|------|------|
|                      | (1585) | 1585                                             | 1590 | 1600 | 1610 | 1620 | 1632 |
| Msmeg-katG-coding    | (1585) | GAGCGGATCCAGCAGGACTTCAACGCCTCGGCATCCGGCGGCAAGAAG |      |      |      |      |      |
| 5-10-katG-Cterm-1-8R | (141)  | GAGCGGATCCAGCAGGACTTCAACGCCTCGGCATCCGGCGGCAAGAAG |      |      |      |      |      |
| 5-10-katG-Cterm-3s   | (444)  | GAGCGGATCCAGCAGGACTTCAACGCCTCGGCATCCGGCGGCAAGAAG |      |      |      |      |      |

Section 35

|                      |        |                                                  |      |      |      |      |      |
|----------------------|--------|--------------------------------------------------|------|------|------|------|------|
|                      | (1633) | 1633                                             | 1640 | 1650 | 1660 | 1670 | 1680 |
| Msmeg-katG-coding    | (1633) | GTCTCGTTGGCCGACCTGATCGTGCTGGCCGGTTCGGCGGCGATCGAG |      |      |      |      |      |
| 5-10-katG-Cterm-1-8R | (189)  | GTCTCGTTGGCCGACCTGATCKKTWWRYKA-----              |      |      |      |      |      |
| 5-10-katG-Cterm-3s   | (492)  | GTCTCGTTGGCCGACCTGATCGTGCTGGCCGGTTCGGCGGCGATCGAG |      |      |      |      |      |

Section 36

|                      |        |                                                   |      |      |      |      |
|----------------------|--------|---------------------------------------------------|------|------|------|------|
|                      | (1681) | 1681                                              | 1690 | 1700 | 1710 | 1728 |
| Msmeg-katG-coding    | (1681) | AAGGCCGCCAAGGACGGTGGCTACAACGTCACGGTGCCGTTTCGCACCG |      |      |      |      |
| 5-10-katG-Cterm-1-8R | (219)  | -----                                             |      |      |      |      |
| 5-10-katG-Cterm-3s   | (540)  | AAGGCCGCCAAGGACA-----                             |      |      |      |      |

Section 37

|                      |        |                                                  |      |      |      |      |
|----------------------|--------|--------------------------------------------------|------|------|------|------|
|                      | (1729) | 1729                                             | 1740 | 1750 | 1760 | 1776 |
| Msmeg-katG-coding    | (1729) | GGACGCACGGACGCGAGCCAGGAGAACACCGACGTGGAGTCTTTCGCG |      |      |      |      |
| 5-10-katG-Cterm-1-8R | (219)  | -----                                            |      |      |      |      |
| 5-10-katG-Cterm-3s   | (556)  | -----                                            |      |      |      |      |

Section 38

|                      |        |                                                 |      |      |      |      |
|----------------------|--------|-------------------------------------------------|------|------|------|------|
|                      | (1777) | 1777                                            | 1790 | 1800 | 1810 | 1824 |
| Msmeg-katG-coding    | (1777) | GTGCTCGAGCCGCGGGCCGACGGGTTCGCAACTACGTCCGCCCGGGT |      |      |      |      |
| 5-10-katG-Cterm-1-8R | (219)  | -----                                           |      |      |      |      |
| 5-10-katG-Cterm-3s   | (556)  | -----                                           |      |      |      |      |

Section 39

|                      |        |                                                  |      |      |      |      |      |
|----------------------|--------|--------------------------------------------------|------|------|------|------|------|
|                      | (1825) | 1825                                             | 1830 | 1840 | 1850 | 1860 | 1872 |
| Msmeg-katG-coding    | (1825) | GAGAAGGTCCAGCTGGAGAAGATGCTGCTCGAACGGGCGTACTTCCTG |      |      |      |      |      |
| 5-10-katG-Cterm-1-8R | (219)  | -----                                            |      |      |      |      |      |
| 5-10-katG-Cterm-3s   | (556)  | -----                                            |      |      |      |      |      |

Section 40

|                      |        |                                                  |      |      |      |      |      |
|----------------------|--------|--------------------------------------------------|------|------|------|------|------|
|                      | (1873) | 1873                                             | 1880 | 1890 | 1900 | 1910 | 1920 |
| Msmeg-katG-coding    | (1873) | GGCGTGACCGCACCGCAGCTGACGGCTCTGGTCGGCGGGTTGCGCGCG |      |      |      |      |      |
| 5-10-katG-Cterm-1-8R | (219)  | -----                                            |      |      |      |      |      |
| 5-10-katG-Cterm-3s   | (556)  | -----                                            |      |      |      |      |      |

Section 41

|                      |        |                                                 |                      |                      |                      |                      |
|----------------------|--------|-------------------------------------------------|----------------------|----------------------|----------------------|----------------------|
|                      | (1921) | <a href="#">1921</a>                            | <a href="#">1930</a> | <a href="#">1940</a> | <a href="#">1950</a> | <a href="#">1968</a> |
| Msmeg-katG-coding    | (1921) | CTGGACGTCAACCACGGCGGCACCAAACACGGTGTGTTACCGACCGG |                      |                      |                      |                      |
| 5-10-katG-Cterm-1-8R | (219)  | -----                                           |                      |                      |                      |                      |
| 5-10-katG-Cterm-3s   | (556)  | -----                                           |                      |                      |                      |                      |

Section 42

|                      |        |                                                  |                      |                      |                      |                      |
|----------------------|--------|--------------------------------------------------|----------------------|----------------------|----------------------|----------------------|
|                      | (1969) | <a href="#">1969</a>                             | <a href="#">1980</a> | <a href="#">1990</a> | <a href="#">2000</a> | <a href="#">2016</a> |
| Msmeg-katG-coding    | (1969) | CCGGGCGCTTTGACCAACGACTTCTTCGTCAACCTGCTCGACATGGGC |                      |                      |                      |                      |
| 5-10-katG-Cterm-1-8R | (219)  | -----                                            |                      |                      |                      |                      |
| 5-10-katG-Cterm-3s   | (556)  | -----                                            |                      |                      |                      |                      |

Section 43

|                      |        |                                                  |                      |                      |                      |                      |
|----------------------|--------|--------------------------------------------------|----------------------|----------------------|----------------------|----------------------|
|                      | (2017) | <a href="#">2017</a>                             | <a href="#">2030</a> | <a href="#">2040</a> | <a href="#">2050</a> | <a href="#">2064</a> |
| Msmeg-katG-coding    | (2017) | ACCGAGTGGAAGACCTCGGAGACGACGGAGAACGTCTACGAGGGAGTC |                      |                      |                      |                      |
| 5-10-katG-Cterm-1-8R | (219)  | -----                                            |                      |                      |                      |                      |
| 5-10-katG-Cterm-3s   | (556)  | -----                                            |                      |                      |                      |                      |

Section 44

|                      |        |                                                  |                      |                      |                      |                      |                      |
|----------------------|--------|--------------------------------------------------|----------------------|----------------------|----------------------|----------------------|----------------------|
|                      | (2065) | <a href="#">2065</a>                             | <a href="#">2070</a> | <a href="#">2080</a> | <a href="#">2090</a> | <a href="#">2100</a> | <a href="#">2112</a> |
| Msmeg-katG-coding    | (2065) | GATCGCAAGACCGGACAGTTGAAGTGGACCGCGACCGCGAATGACCTT |                      |                      |                      |                      |                      |
| 5-10-katG-Cterm-1-8R | (219)  | -----                                            |                      |                      |                      |                      |                      |
| 5-10-katG-Cterm-3s   | (556)  | -----                                            |                      |                      |                      |                      |                      |

Section 45

|                      |        |                                                  |                      |                      |                      |                      |                      |
|----------------------|--------|--------------------------------------------------|----------------------|----------------------|----------------------|----------------------|----------------------|
|                      | (2113) | <a href="#">2113</a>                             | <a href="#">2120</a> | <a href="#">2130</a> | <a href="#">2140</a> | <a href="#">2150</a> | <a href="#">2160</a> |
| Msmeg-katG-coding    | (2113) | GTGTTGCGGTCACATTCGGTGCTGCGTGCCGTGGCCGAGGTTTATGCC |                      |                      |                      |                      |                      |
| 5-10-katG-Cterm-1-8R | (219)  | -----                                            |                      |                      |                      |                      |                      |
| 5-10-katG-Cterm-3s   | (556)  | -----                                            |                      |                      |                      |                      |                      |

Section 46

|                      |        |                                                  |                      |                      |                      |                      |
|----------------------|--------|--------------------------------------------------|----------------------|----------------------|----------------------|----------------------|
|                      | (2161) | <a href="#">2161</a>                             | <a href="#">2170</a> | <a href="#">2180</a> | <a href="#">2190</a> | <a href="#">2208</a> |
| Msmeg-katG-coding    | (2161) | CAGTCCGACAACGGCGAACGGTTCGTCAACGACTTCGTCAAGGCCTGG |                      |                      |                      |                      |
| 5-10-katG-Cterm-1-8R | (219)  | -----                                            |                      |                      |                      |                      |
| 5-10-katG-Cterm-3s   | (556)  | -----                                            |                      |                      |                      |                      |

Section 47

|                      |        |                                          |                      |                      |                      |
|----------------------|--------|------------------------------------------|----------------------|----------------------|----------------------|
|                      | (2209) | <a href="#">2209</a>                     | <a href="#">2220</a> | <a href="#">2230</a> | <a href="#">2247</a> |
| Msmeg-katG-coding    | (2209) | GTCAAGGTCATGAACAACGACCGGTTTCGACCTCAAGTAA |                      |                      |                      |
| 5-10-katG-Cterm-1-8R | (219)  | -----                                    |                      |                      |                      |
| 5-10-katG-Cterm-3s   | (556)  | -----                                    |                      |                      |                      |

|                   |        |                                                        |      |      |      |           |
|-------------------|--------|--------------------------------------------------------|------|------|------|-----------|
|                   |        | Section 19                                             |      |      |      |           |
|                   | (883)  | 883                                                    | 890  | 900  | 910  | 920 931   |
| Msmeg-katG-coding | (883)  | CCCGAGCCCGAGGCCGCACCGATCGAGCAGCAGGGTCTCGGCTGGAAGA      |      |      |      |           |
| 5-10-katG-Cmidd   | (1)    | -----                                                  |      |      |      |           |
|                   |        | Section 20                                             |      |      |      |           |
|                   | (932)  | 932                                                    | 940  | 950  | 960  | 970 980   |
| Msmeg-katG-coding | (932)  | GTTCTTACGGCACGGGCAAGGGTCCCGACACCATCACCAGCGGGCTGGA      |      |      |      |           |
| 5-10-katG-Cmidd   | (1)    | -----                                                  |      |      |      |           |
|                   |        | Section 21                                             |      |      |      |           |
|                   | (981)  | 981                                                    | 990  | 1000 | 1010 | 1029      |
| Msmeg-katG-coding | (981)  | GGTCGTGTGGACCAACACACCGACCAAGTGGGACAACAGCTTCCTGGAG      |      |      |      |           |
| 5-10-katG-Cmidd   | (1)    | -----                                                  |      |      |      |           |
|                   |        | Section 22                                             |      |      |      |           |
|                   | (1030) | 1030                                                   | 1040 | 1050 | 1060 | 1078      |
| Msmeg-katG-coding | (1030) | ATCCTCTACGGCTACGAGTGGGAGCTGACCAAGAGCCCGGCCGGCGCCT      |      |      |      |           |
| 5-10-katG-Cmidd   | (1)    | -----                                                  |      |      |      |           |
|                   |        | Section 23                                             |      |      |      |           |
|                   | (1079) | 1079                                                   | 1090 | 1100 | 1110 | 1127      |
| Msmeg-katG-coding | (1079) | GGCAGTTCACCGCGAAGGACGGGGCAGGCGCGGGCACCATCCCGGATCC      |      |      |      |           |
| 5-10-katG-Cmidd   | (1)    | -----                                                  |      |      |      |           |
|                   |        | Section 24                                             |      |      |      |           |
|                   | (1128) | 1128                                                   | 1140 | 1150 | 1160 | 1176      |
| Msmeg-katG-coding | (1128) | GTTCTGGCGGGCCAGGACGCAACCCGACCATGCTGGTCACCGACATCTCG     |      |      |      |           |
| 5-10-katG-Cmidd   | (1)    | -----                                                  |      |      |      |           |
|                   |        | Section 25                                             |      |      |      |           |
|                   | (1177) | 1177                                                   | 1190 | 1200 | 1210 | 1225      |
| Msmeg-katG-coding | (1177) | ATGCGCGTGGACCCGATCTACGGGAAGATCACGCGCCGGTGGCTCGACC      |      |      |      |           |
| 5-10-katG-Cmidd   | (1)    | -----                                                  |      |      |      |           |
|                   |        | Section 26                                             |      |      |      |           |
|                   | (1226) | 1226                                                   | 1240 | 1250 | 1260 | 1274      |
| Msmeg-katG-coding | (1226) | ATCCCGAGGAGCTCTCGGAGGCCTTCGCGAAGGCCTGGTACAAGCTGCT      |      |      |      |           |
| 5-10-katG-Cmidd   | (1)    | -----                                                  |      |      |      |           |
|                   |        | Section 27                                             |      |      |      |           |
|                   | (1275) | 1275                                                   | 1280 | 1290 | 1300 | 1310 1323 |
| Msmeg-katG-coding | (1275) | GCACCGCGA CATGGG AC CGATCT CGCG GTATCTGGGGCCCTGGGTGCGC |      |      |      |           |
| 5-10-katG-Cmidd   | (1)    | ----- CATGGG CW CGATCT KCGC GTATCTGGGGCCCTGGGTGCGC     |      |      |      |           |

|                   |        |                                                         |      |      |      |      |      |
|-------------------|--------|---------------------------------------------------------|------|------|------|------|------|
|                   |        | Section 28                                              |      |      |      |      |      |
|                   | (1324) | 1324                                                    | 1330 | 1340 | 1350 | 1360 | 1372 |
| Msmeg-katG-coding | (1324) | GAACCGCAGCTGTGGCAGGACCCGGTCCC GGCGGTTCGATCATCCGCTGG     |      |      |      |      |      |
| 5-10-katG-Cmidd   | (41)   | GAACCGCAGCTGTGGCAGGACCCGGTCCC GGCGGTTCGATCATCCGCTGG     |      |      |      |      |      |
|                   |        | Section 29                                              |      |      |      |      |      |
|                   | (1373) | 1373                                                    | 1380 | 1390 | 1400 | 1410 | 1421 |
| Msmeg-katG-coding | (1373) | TCGACGACCAGGACATCGCCGCGCTGAAGTCCACGGTGCTCGATTCCGG       |      |      |      |      |      |
| 5-10-katG-Cmidd   | (90)   | TCGACGACCAGGACATCGCCGCGCTGAAGTCCACGGTGCTCGATTCCGG       |      |      |      |      |      |
|                   |        | Section 30                                              |      |      |      |      |      |
|                   | (1422) | 1422                                                    | 1430 | 1440 | 1450 | 1460 | 1470 |
| Msmeg-katG-coding | (1422) | GCTGTTCGACGGGACAACCTGATCAAGACTGCGTG GGGCGTCGGCGGGCAGAGC |      |      |      |      |      |
| 5-10-katG-Cmidd   | (139)  | GCTGTTCGACGGGACAACCTGATCAAGACTGCGTG GGGCGTCGGCGGGCAGAGC |      |      |      |      |      |
|                   |        | Section 31                                              |      |      |      |      |      |
|                   | (1471) | 1471                                                    | 1480 | 1490 | 1500 |      | 1519 |
| Msmeg-katG-coding | (1471) | TACCGCAACACCGACAAGCGCGGGCGGCCCAACGGGGCCCGGGTGCGTTC      |      |      |      |      |      |
| 5-10-katG-Cmidd   | (188)  | TACCGCAACACCGACAAGCGCGGGCGGCCCAACGGGGCCCGGGTGCGTTC      |      |      |      |      |      |
|                   |        | Section 32                                              |      |      |      |      |      |
|                   | (1520) | 1520                                                    | 1530 | 1540 | 1550 |      | 1568 |
| Msmeg-katG-coding | (1520) | TGGAAACCGCAGAAGAAGCTGGGACGTCAACGAACCGGCCGAAC TGGCCAC    |      |      |      |      |      |
| 5-10-katG-Cmidd   | (237)  | TGGAAACCGCAGAAGAAGCTGGGACGTCAACGAACCGGCCGAAC TGGCCAC    |      |      |      |      |      |
|                   |        | Section 33                                              |      |      |      |      |      |
|                   | (1569) | 1569                                                    | 1580 | 1590 | 1600 |      | 1617 |
| Msmeg-katG-coding | (1569) | GGTGCTGCCGGTGCTCGAGCGGATCCAGCAGGACTTCAACGCC CTCGGCA     |      |      |      |      |      |
| 5-10-katG-Cmidd   | (286)  | GGTGCTGCCGGTGCTCGAGCGGATCCAGCAGGACTTCAACGCC CTCGGCA     |      |      |      |      |      |
|                   |        | Section 34                                              |      |      |      |      |      |
|                   | (1618) | 1618                                                    | 1630 | 1640 | 1650 |      | 1666 |
| Msmeg-katG-coding | (1618) | TCCGGCGGCAAGAAGGTCTCGTTGGCCGACCTGATCGTGCTGGCCGGTT       |      |      |      |      |      |
| 5-10-katG-Cmidd   | (335)  | TCCGGCGGCAAGAAGGTCTCGTTGGCCGACCTGATCGTGCTGGCCGGTT       |      |      |      |      |      |
|                   |        | Section 35                                              |      |      |      |      |      |
|                   | (1667) | 1667                                                    | 1680 | 1690 | 1700 |      | 1715 |
| Msmeg-katG-coding | (1667) | CGGCGGGCGATCGAGAAGGCCGCCAAGGACGGTGGCTACAACGTCACGGT      |      |      |      |      |      |
| 5-10-katG-Cmidd   | (384)  | CGGCGGGCGATCGAGAAGGCCGCCAAGGACGGTGGCTACAACGTCACGGT      |      |      |      |      |      |
|                   |        | Section 36                                              |      |      |      |      |      |
|                   | (1716) | 1716                                                    | 1730 | 1740 | 1750 |      | 1764 |
| Msmeg-katG-coding | (1716) | GCCGTTTCGCACCGGGACGCACGGACGCGAGCCAGGAGAACACCGACGTG      |      |      |      |      |      |
| 5-10-katG-Cmidd   | (433)  | GCCGTTTCGCACCGGGACGCACGGACGCGAGCCAGGAGAACACCGACGTG      |      |      |      |      |      |

|                   |        |                                                    |      |      |      |      |                    |
|-------------------|--------|----------------------------------------------------|------|------|------|------|--------------------|
|                   |        | Section 37                                         |      |      |      |      |                    |
|                   | (1765) | 1765                                               | 1770 | 1780 | 1790 | 1800 | 1813               |
| Msmeg-katG-coding | (1765) | GAGTCCTTCGCGGTGCTCGAGCCGCGGGCC                     |      |      |      |      | GACGGGTTCGCAACTACG |
| 5-10-katG-Cmidd   | (482)  | GAGTCCTTCGCGGTGCTCGAGCCGCGGGCC                     |      |      |      |      | -----              |
|                   |        | Section 38                                         |      |      |      |      |                    |
|                   | (1814) | 1814                                               | 1820 | 1830 | 1840 | 1850 | 1862               |
| Msmeg-katG-coding | (1814) | TCCGCCCCGGGTGAGAAGGTCCAGCTGGAGAAGATGCTGCTCGAACGGGC |      |      |      |      |                    |
| 5-10-katG-Cmidd   | (512)  | -----                                              |      |      |      |      |                    |
|                   |        | Section 39                                         |      |      |      |      |                    |
|                   | (1863) | 1863                                               | 1870 | 1880 | 1890 | 1900 | 1911               |
| Msmeg-katG-coding | (1863) | GTACTTCCTGGGCGTGACCGCACCGCAGCTGACGGCTCTGGTCGGCGGG  |      |      |      |      |                    |
| 5-10-katG-Cmidd   | (512)  | -----                                              |      |      |      |      |                    |
|                   |        | Section 40                                         |      |      |      |      |                    |
|                   | (1912) | 1912                                               | 1920 | 1930 | 1940 | 1950 | 1960               |
| Msmeg-katG-coding | (1912) | TTGCGCGCGCTGGACGTCAACCACGGCGGCACCAAACACGGTGTGTTCA  |      |      |      |      |                    |
| 5-10-katG-Cmidd   | (512)  | -----                                              |      |      |      |      |                    |
|                   |        | Section 41                                         |      |      |      |      |                    |
|                   | (1961) | 1961                                               | 1970 | 1980 | 1990 | 2009 |                    |
| Msmeg-katG-coding | (1961) | CCGACCGGCCGGGCGCTTTGACCAACGACTTCTTCGTCAACCTGCTCGA  |      |      |      |      |                    |
| 5-10-katG-Cmidd   | (512)  | -----                                              |      |      |      |      |                    |
|                   |        | Section 42                                         |      |      |      |      |                    |
|                   | (2010) | 2010                                               | 2020 | 2030 | 2040 | 2058 |                    |
| Msmeg-katG-coding | (2010) | CATGGGCACCGAGTGGAAGACCTCGGAGACGACGGAGAACGTCTACGAG  |      |      |      |      |                    |
| 5-10-katG-Cmidd   | (512)  | -----                                              |      |      |      |      |                    |
|                   |        | Section 43                                         |      |      |      |      |                    |
|                   | (2059) | 2059                                               | 2070 | 2080 | 2090 | 2107 |                    |
| Msmeg-katG-coding | (2059) | GGAGTCGATCGCAAGACCGGACAGTTGAAGTGGACCGCGACCGCGAATG  |      |      |      |      |                    |
| 5-10-katG-Cmidd   | (512)  | -----                                              |      |      |      |      |                    |
|                   |        | Section 44                                         |      |      |      |      |                    |
|                   | (2108) | 2108                                               | 2120 | 2130 | 2140 | 2156 |                    |
| Msmeg-katG-coding | (2108) | ACCTTGTGTTTCGGGTCACATTCGGTGCTGCGTGCCGTGGCCGAGGTTTA |      |      |      |      |                    |
| 5-10-katG-Cmidd   | (512)  | -----                                              |      |      |      |      |                    |
|                   |        | Section 45                                         |      |      |      |      |                    |
|                   | (2157) | 2157                                               | 2170 | 2180 | 2190 | 2205 |                    |
| Msmeg-katG-coding | (2157) | TGCCCAGTCCGACAACGGCGAACGGTTCGTCAACGACTTCGTCAAGGCC  |      |      |      |      |                    |
| 5-10-katG-Cmidd   | (512)  | -----                                              |      |      |      |      |                    |

Section 1

|                   |     |                                                    |    |    |    |    |    |
|-------------------|-----|----------------------------------------------------|----|----|----|----|----|
|                   | (1) | 1                                                  | 10 | 20 | 30 | 40 | 51 |
| Msmeg-katG-coding | (1) | GTGTCATCCGATACATCTGACAGCCGCCACCCAACCCGGATACGAAGACC |    |    |    |    |    |
| 9-06-2-4fkatG     | (1) | -----                                              |    |    |    |    |    |
| 9-06-4fCter-katG  | (1) | -----                                              |    |    |    |    |    |

Section 2

|                   |      |                                                     |    |    |    |    |     |
|-------------------|------|-----------------------------------------------------|----|----|----|----|-----|
|                   | (52) | 52                                                  | 60 | 70 | 80 | 90 | 102 |
| Msmeg-katG-coding | (52) | GCGAGCACGAGCGAGAGCGAAAAACCCGCGATCCCTTCCCCGAAGCCGAAA |    |    |    |    |     |
| 9-06-2-4fkatG     | (1)  | -----                                               |    |    |    |    |     |
| 9-06-4fCter-katG  | (1)  | -----                                               |    |    |    |    |     |

Section 3

|                   |       |                                                     |     |     |     |     |     |
|-------------------|-------|-----------------------------------------------------|-----|-----|-----|-----|-----|
|                   | (103) | 103                                                 | 110 | 120 | 130 | 140 | 153 |
| Msmeg-katG-coding | (103) | TCGGGCGCTCCGCTTCGCAACCAGGACTGGTGGCCCAACCAGATCGACGTA |     |     |     |     |     |
| 9-06-2-4fkatG     | (1)   | -----                                               |     |     |     |     |     |
| 9-06-4fCter-katG  | (1)   | -----                                               |     |     |     |     |     |

Section 4

|                   |       |                                                     |     |     |     |     |     |
|-------------------|-------|-----------------------------------------------------|-----|-----|-----|-----|-----|
|                   | (154) | 154                                                 | 160 | 170 | 180 | 190 | 204 |
| Msmeg-katG-coding | (154) | TCACGCCTGCATCCGCATCCCCCGCAGGGCAACCCGCTGGGCGAAGACTTC |     |     |     |     |     |
| 9-06-2-4fkatG     | (1)   | -----                                               |     |     |     |     |     |
| 9-06-4fCter-katG  | (1)   | -----                                               |     |     |     |     |     |

Section 5

|                   |       |                                                     |     |     |     |     |     |
|-------------------|-------|-----------------------------------------------------|-----|-----|-----|-----|-----|
|                   | (205) | 205                                                 | 210 | 220 | 230 | 240 | 255 |
| Msmeg-katG-coding | (205) | GACTACGCCGAGGAATTGCGCAAGCTCGACGTGAACGCGCTCAAGGCCGAC |     |     |     |     |     |
| 9-06-2-4fkatG     | (1)   | -----                                               |     |     |     |     |     |
| 9-06-4fCter-katG  | (1)   | -----                                               |     |     |     |     |     |

Section 6

|                   |       |                                                     |     |     |     |     |
|-------------------|-------|-----------------------------------------------------|-----|-----|-----|-----|
|                   | (256) | 256                                                 | 270 | 280 | 290 | 306 |
| Msmeg-katG-coding | (256) | CTCACGGCGCTGATGACGCAGTCCCAGGACTGGTGGCCCGCCGACTACGGG |     |     |     |     |
| 9-06-2-4fkatG     | (1)   | -----                                               |     |     |     |     |
| 9-06-4fCter-katG  | (1)   | -----                                               |     |     |     |     |

Section 7

|                   |       |                                                       |     |     |     |     |
|-------------------|-------|-------------------------------------------------------|-----|-----|-----|-----|
|                   | (307) | 307                                                   | 320 | 330 | 340 | 357 |
| Msmeg-katG-coding | (307) | CACTACGGCGGCCCTGTTTCATCCGTATGAGCTGGCACTCGGCAGGCACCTAC |     |     |     |     |
| 9-06-2-4fkatG     | (1)   | -----                                                 |     |     |     |     |
| 9-06-4fCter-katG  | (1)   | -----                                                 |     |     |     |     |

Section 8

|                   |       |                                                      |     |     |     |     |
|-------------------|-------|------------------------------------------------------|-----|-----|-----|-----|
|                   | (358) | 358                                                  | 370 | 380 | 390 | 408 |
| Msmeg-katG-coding | (358) | CGCATCCATGACGGCCGCGGGGGCGGGCGGGCAGGGCGCCCAACGGTTCGCA |     |     |     |     |
| 9-06-2-4fkatG     | (1)   | -----                                                |     |     |     |     |
| 9-06-4fCter-katG  | (1)   | -----                                                |     |     |     |     |

Section 9

|                   |       |                                                     |     |     |     |     |
|-------------------|-------|-----------------------------------------------------|-----|-----|-----|-----|
|                   | (409) | 409                                                 | 420 | 430 | 440 | 459 |
| Msmeg-katG-coding | (409) | CCGATCAACTCGTGGCCCGACAACGTCAGCCTGGACAAGGCCAGAAGACTG |     |     |     |     |
| 9-06-2-4fkatG     | (1)   | -----                                               |     |     |     |     |
| 9-06-4fCter-katG  | (1)   | -----                                               |     |     |     |     |

Section 10

|                   |       |                                                     |     |     |     |     |     |
|-------------------|-------|-----------------------------------------------------|-----|-----|-----|-----|-----|
|                   | (460) | 460                                                 | 470 | 480 | 490 | 500 | 510 |
| Msmeg-katG-coding | (460) | TTGTGGCCCATCAAGCAGAAGTACGGCAACAAGATCTCCTGGGCCGATCTT |     |     |     |     |     |
| 9-06-2-4fkatG     | (1)   | -----                                               |     |     |     |     |     |
| 9-06-4fCter-katG  | (1)   | -----                                               |     |     |     |     |     |

Section 11

|                   |       |                                                     |     |     |     |     |     |
|-------------------|-------|-----------------------------------------------------|-----|-----|-----|-----|-----|
|                   | (511) | 511                                                 | 520 | 530 | 540 | 550 | 561 |
| Msmeg-katG-coding | (511) | CTGGTGTTCACCGGCAACGTGGCTTTGGAATCCATGGGCTTCAAGACGTTT |     |     |     |     |     |
| 9-06-2-4fkatG     | (1)   | -----                                               |     |     |     |     |     |
| 9-06-4fCter-katG  | (1)   | -----                                               |     |     |     |     |     |

Section 12

|                   |       |                                                     |     |     |     |     |     |
|-------------------|-------|-----------------------------------------------------|-----|-----|-----|-----|-----|
|                   | (562) | 562                                                 | 570 | 580 | 590 | 600 | 612 |
| Msmeg-katG-coding | (562) | GGCTTCGGCTTCGGCCGCGAGGACATCTGGGAGCCAGAGGAGATCCTGTTC |     |     |     |     |     |
| 9-06-2-4fkatG     | (1)   | -----                                               |     |     |     |     |     |
| 9-06-4fCter-katG  | (1)   | -----                                               |     |     |     |     |     |

Section 13

|                   |       |                                                      |     |     |     |     |     |
|-------------------|-------|------------------------------------------------------|-----|-----|-----|-----|-----|
|                   | (613) | 613                                                  | 620 | 630 | 640 | 650 | 663 |
| Msmeg-katG-coding | (613) | GGCGAGGAAGACGAATGGCTGGGCACCGACAAGCGGTACGGCGGGCGGCGAG |     |     |     |     |     |
| 9-06-2-4fkatG     | (1)   | -----                                                |     |     |     |     |     |
| 9-06-4fCter-katG  | (1)   | -----                                                |     |     |     |     |     |

Section 14

|                   |       |                                                     |     |     |     |     |     |
|-------------------|-------|-----------------------------------------------------|-----|-----|-----|-----|-----|
|                   | (664) | 664                                                 | 670 | 680 | 690 | 700 | 714 |
| Msmeg-katG-coding | (664) | CAGCGCCAACTCGCCGAACCGTACGGTGCGACCACGATGGGCCTGATCTAC |     |     |     |     |     |
| 9-06-2-4fkatG     | (1)   | -----                                               |     |     |     |     |     |
| 9-06-4fCter-katG  | (1)   | -----                                               |     |     |     |     |     |

|                   |        |                                                      |      |      |      |      |      |
|-------------------|--------|------------------------------------------------------|------|------|------|------|------|
|                   |        | Section 15                                           |      |      |      |      |      |
|                   | (715)  | 715                                                  | 720  | 730  | 740  | 750  | 765  |
| Msmeg-katG-coding | (715)  | GTCAACCCCGAAGGCCCGGAGGGTCAACCCGACCCGCTCGCCGCGGCACAC  |      |      |      |      |      |
| 9-06-2-4fkatG     | (1)    | -----                                                |      |      |      |      |      |
| 9-06-4fCter-katG  | (1)    | -----                                                |      |      |      |      |      |
|                   |        | Section 16                                           |      |      |      |      |      |
|                   | (766)  | 766                                                  | 780  | 790  | 800  |      | 816  |
| Msmeg-katG-coding | (766)  | GACATCCGCGAGACGTTTCGGCCGCATGGCGATGAACGACGAGGAGACCGCG |      |      |      |      |      |
| 9-06-2-4fkatG     | (1)    | -----                                                |      |      |      |      |      |
| 9-06-4fCter-katG  | (1)    | -----                                                |      |      |      |      |      |
|                   |        | Section 17                                           |      |      |      |      |      |
|                   | (817)  | 817                                                  | 830  | 840  | 850  |      | 867  |
| Msmeg-katG-coding | (817)  | GCGCTGATCGTCGGCGGGCACACGTTTCGGCAAGACCCACGGCGCCGGCGAT |      |      |      |      |      |
| 9-06-2-4fkatG     | (1)    | -----                                                |      |      |      |      |      |
| 9-06-4fCter-katG  | (1)    | -----                                                |      |      |      |      |      |
|                   |        | Section 18                                           |      |      |      |      |      |
|                   | (868)  | 868                                                  | 880  | 890  | 900  |      | 918  |
| Msmeg-katG-coding | (868)  | GCCAGCCTCGTCGGTCCCGAGCCCGAGGGCCGACCCGATCGAGCAGCAGGGT |      |      |      |      |      |
| 9-06-2-4fkatG     | (1)    | -----                                                |      |      |      |      |      |
| 9-06-4fCter-katG  | (1)    | -----                                                |      |      |      |      |      |
|                   |        | Section 19                                           |      |      |      |      |      |
|                   | (919)  | 919                                                  | 930  | 940  | 950  |      | 969  |
| Msmeg-katG-coding | (919)  | CTCGGCTGGAAGAGTTCCTACGGCACGGGCAAGGGTCCCGACACCATCACC  |      |      |      |      |      |
| 9-06-2-4fkatG     | (1)    | -----                                                |      |      |      |      |      |
| 9-06-4fCter-katG  | (1)    | -----                                                |      |      |      |      |      |
|                   |        | Section 20                                           |      |      |      |      |      |
|                   | (970)  | 970                                                  | 980  | 990  | 1000 | 1010 | 1020 |
| Msmeg-katG-coding | (970)  | AGCGGGCTGGAGGTCGTGTGGACCAACACACCGACCAAGTGGGACAACAGC  |      |      |      |      |      |
| 9-06-2-4fkatG     | (1)    | -----                                                |      |      |      |      |      |
| 9-06-4fCter-katG  | (1)    | -----                                                |      |      |      |      |      |
|                   |        | Section 21                                           |      |      |      |      |      |
|                   | (1021) | 1021                                                 | 1030 | 1040 | 1050 | 1060 | 1071 |
| Msmeg-katG-coding | (1021) | TTCCTGGAGATCCTCTACGGCTACGAGTGGGAGCTGACCAAGAGCCCGGCC  |      |      |      |      |      |
| 9-06-2-4fkatG     | (1)    | -----                                                |      |      |      |      |      |
| 9-06-4fCter-katG  | (1)    | -----                                                |      |      |      |      |      |



|                   |        |                                                       |      |      |      |      |      |
|-------------------|--------|-------------------------------------------------------|------|------|------|------|------|
|                   |        | Section 22                                            |      |      |      |      |      |
|                   | (1072) | 1072                                                  | 1080 | 1090 | 1100 | 1110 | 1122 |
| Msmeg-katG-coding | (1072) | GGCGCCTGGCAGTTCACCGCGAAGGACGGGGCAGGCGCGGGCACCATCCCG   |      |      |      |      |      |
| 9-06-2-4fkatG     | (1)    | -----                                                 |      |      |      |      |      |
| 9-06-4fCter-katG  | (1)    | -----                                                 |      |      |      |      |      |
|                   |        | Section 23                                            |      |      |      |      |      |
|                   | (1123) | 1123                                                  | 1130 | 1140 | 1150 | 1160 | 1173 |
| Msmeg-katG-coding | (1123) | GATCCGTTTCGGCGGGCCAGGACGCAACCCGACCATGCTGGTTCACCGACATC |      |      |      |      |      |
| 9-06-2-4fkatG     | (1)    | -----                                                 |      |      |      |      |      |
| 9-06-4fCter-katG  | (1)    | -----                                                 |      |      |      |      |      |
|                   |        | Section 24                                            |      |      |      |      |      |
|                   | (1174) | 1174                                                  | 1180 | 1190 | 1200 | 1210 | 1224 |
| Msmeg-katG-coding | (1174) | TCGATGCGCGTGGACCCGATCTACGGGAAGATCACGCGCCGGTGGCTCGAC   |      |      |      |      |      |
| 9-06-2-4fkatG     | (1)    | -----                                                 |      |      |      |      |      |
| 9-06-4fCter-katG  | (1)    | -----                                                 |      |      |      |      |      |
|                   |        | Section 25                                            |      |      |      |      |      |
|                   | (1225) | 1225                                                  | 1230 | 1240 | 1250 | 1260 | 1275 |
| Msmeg-katG-coding | (1225) | CATCCCGAGGAGCTCTCGGAGGCCTTCGCGAAGGCCTGGTACAAGCTGCTG   |      |      |      |      |      |
| 9-06-2-4fkatG     | (1)    | -----                                                 |      |      |      |      |      |
| 9-06-4fCter-katG  | (1)    | -----                                                 |      |      |      |      |      |
|                   |        | Section 26                                            |      |      |      |      |      |
|                   | (1276) | 1276                                                  | 1290 | 1300 | 1310 |      | 1326 |
| Msmeg-katG-coding | (1276) | CACCGCGACATGGGACCGATCTCGCGGTATCTGGGGCCCTGGGTCGCCGAA   |      |      |      |      |      |
| 9-06-2-4fkatG     | (1)    | -----                                                 |      |      |      |      |      |
| 9-06-4fCter-katG  | (1)    | -----                                                 |      |      |      |      |      |
|                   |        | Section 27                                            |      |      |      |      |      |
|                   | (1327) | 1327                                                  | 1340 | 1350 | 1360 |      | 1377 |
| Msmeg-katG-coding | (1327) | CCGCAGCTGTGGCAGGACCCGGTCCCGGCGGTTCGATCATCCGCTGGTCGAC  |      |      |      |      |      |
| 9-06-2-4fkatG     | (1)    | -----                                                 |      |      |      |      |      |
| 9-06-4fCter-katG  | (1)    | -----                                                 |      |      |      |      |      |
|                   |        | Section 28                                            |      |      |      |      |      |
|                   | (1378) | 1378                                                  | 1390 | 1400 | 1410 |      | 1428 |
| Msmeg-katG-coding | (1378) | GACCAGGACATCGCCGCGCTGAAGTCCACGGTGCTCGATTCCGGGCTGTCTG  |      |      |      |      |      |
| 9-06-2-4fkatG     | (1)    | -----                                                 |      |      |      |      |      |
| 9-06-4fCter-katG  | (1)    | -----                                                 |      |      |      |      |      |

Section 29

|                   |        |                                                      |      |      |      |      |
|-------------------|--------|------------------------------------------------------|------|------|------|------|
|                   | (1429) | 1429                                                 | 1440 | 1450 | 1460 | 1479 |
| Msmeg-katG-coding | (1429) | ACGGGACAAC TGATCAAGACTGCGTGGGCGTCGGCGGCGAGCTACCGCAAC |      |      |      |      |
| 9-06-2-4fkatG     | (1)    | -----                                                |      |      |      |      |
| 9-06-4fCter-katG  | (1)    | -----                                                |      |      |      |      |

Section 30

|                   |        |                                                  |      |      |      |      |      |
|-------------------|--------|--------------------------------------------------|------|------|------|------|------|
|                   | (1480) | 1480                                             | 1490 | 1500 | 1510 | 1520 | 1530 |
| Msmeg-katG-coding | (1480) | ACCGACAAGCGCGGCGGCCAACGGGGCCCGGTGCGTCTGGAACCGCAG |      |      |      |      |      |
| 9-06-2-4fkatG     | (1)    | -----                                            |      |      |      |      |      |
| 9-06-4fCter-katG  | (1)    | -----                                            |      |      |      |      |      |

Section 31

|                   |        |                                                      |      |      |      |      |      |
|-------------------|--------|------------------------------------------------------|------|------|------|------|------|
|                   | (1531) | 1531                                                 | 1540 | 1550 | 1560 | 1570 | 1581 |
| Msmeg-katG-coding | (1531) | AAGAACTGGGACGTCAACGAACCGGCCGAAC TGGCCACGGTGCTGCCGGTG |      |      |      |      |      |
| 9-06-2-4fkatG     | (1)    | -----                                                |      |      |      |      |      |
| 9-06-4fCter-katG  | (1)    | -----                                                |      |      |      |      |      |

Section 32

|                   |        |                                                     |      |      |      |      |      |
|-------------------|--------|-----------------------------------------------------|------|------|------|------|------|
|                   | (1582) | 1582                                                | 1590 | 1600 | 1610 | 1620 | 1632 |
| Msmeg-katG-coding | (1582) | CTCGAGCGGATCCAGCAGGACTTCAACGCCTCGGCATCCGGCGGCAAGAAG |      |      |      |      |      |
| 9-06-2-4fkatG     | (1)    | -----                                               |      |      |      |      |      |
| 9-06-4fCter-katG  | (1)    | -----                                               |      |      |      |      |      |

Section 33

|                   |        |                                                     |      |      |      |      |      |
|-------------------|--------|-----------------------------------------------------|------|------|------|------|------|
|                   | (1633) | 1633                                                | 1640 | 1650 | 1660 | 1670 | 1683 |
| Msmeg-katG-coding | (1633) | GTCTCGTTGGCCGACCTGATCGTGCTGGCCGGTTCGGCGGCGATCGAGAAG |      |      |      |      |      |
| 9-06-2-4fkatG     | (1)    | -----                                               |      |      |      |      |      |
| 9-06-4fCter-katG  | (1)    | -----                                               |      |      |      |      |      |

Section 34

|                   |        |                                                     |      |      |      |      |      |
|-------------------|--------|-----------------------------------------------------|------|------|------|------|------|
|                   | (1684) | 1684                                                | 1690 | 1700 | 1710 | 1720 | 1734 |
| Msmeg-katG-coding | (1684) | GCCGCCAAGGACGGTGGCTACAACGTCACGGTGCCGTTTCGCACGGGACGC |      |      |      |      |      |
| 9-06-2-4fkatG     | (1)    | -----CWWRYMC                                        |      |      |      |      |      |
| 9-06-4fCter-katG  | (1)    | -----CTRAMAM                                        |      |      |      |      |      |

Section 35

|                   |        |                                                      |      |      |      |      |      |
|-------------------|--------|------------------------------------------------------|------|------|------|------|------|
|                   | (1735) | 1735                                                 | 1740 | 1750 | 1760 | 1770 | 1785 |
| Msmeg-katG-coding | (1735) | ACGGACGCGAGCCAGGAGACACCGACGTGGAGTCCTTCGCGGTGCTCGAG   |      |      |      |      |      |
| 9-06-2-4fkatG     | (9)    | MGCGM-GCGR GCCAGGAGA-CACCGACGTGGAGTCCTTCGCGGTGCTCGAG |      |      |      |      |      |
| 9-06-4fCter-katG  | (9)    | A-RGM-GCGAGCCAGGAGA-CACCGACGTGGAGTCCTTCGCGGTGCTCGAG  |      |      |      |      |      |

|                   |        |                                                      |      |      |      |            |
|-------------------|--------|------------------------------------------------------|------|------|------|------------|
|                   |        |                                                      |      |      |      | Section 36 |
|                   | (1786) | 1786                                                 | 1800 | 1810 | 1820 | 1836       |
| Msmeg-katG-coding | (1786) | CCGCGGGCCGACGGGTTCCGCAACTACGTCCGCCCGGGTGAGAAGGTCCAG  |      |      |      |            |
| 9-06-2-4fkatG     | (58)   | CCGCGGGCCGACGGGTTCCGCAACTACGTCCGCCCGGGTGAGAAGGTCCAG  |      |      |      |            |
| 9-06-4fCter-katG  | (57)   | CCGCGGGCCGACGGGTTCCGCAACTACGTCCGCCCGGGTGAGAAGGTCCAG  |      |      |      |            |
|                   |        |                                                      |      |      |      | Section 37 |
|                   | (1837) | 1837                                                 | 1850 | 1860 | 1870 | 1887       |
| Msmeg-katG-coding | (1837) | CTGGAGAAGATGCTGCTCGAACGGGCGTACTTCCTGGGCGTGACCGCACCG  |      |      |      |            |
| 9-06-2-4fkatG     | (109)  | CTGGAGAAGATGCTGCTCGAACGGGCGTACTTCCTGGGCGTGACCGCACCG  |      |      |      |            |
| 9-06-4fCter-katG  | (108)  | CTGGAGAAGATGCTGCTCGAACGGGCGTACTTCCTGGGCGTGACCGCACCG  |      |      |      |            |
|                   |        |                                                      |      |      |      | Section 38 |
|                   | (1888) | 1888                                                 | 1900 | 1910 | 1920 | 1938       |
| Msmeg-katG-coding | (1888) | CAGCTGACGGCTCTGGTCGGCGGGTTGCGCGCGCTGGACGTCAACCACGGC  |      |      |      |            |
| 9-06-2-4fkatG     | (160)  | CAGCTGACGGCTCTGGTCGGCGGGTTGCGCGCGCTGGACGTCAACCACGGC  |      |      |      |            |
| 9-06-4fCter-katG  | (159)  | CAGCTGACGGCTCTGGTCGGCGGGTTGCGCGCGCTGGACGTCAACCACGGC  |      |      |      |            |
|                   |        |                                                      |      |      |      | Section 39 |
|                   | (1939) | 1939                                                 | 1950 | 1960 | 1970 | 1989       |
| Msmeg-katG-coding | (1939) | GGCACCAAACACGGTGTGTTACCGACCGGCCGGGCGCTTTGACCAACGAC   |      |      |      |            |
| 9-06-2-4fkatG     | (211)  | GGCACCAAACACGGTGTGTTACCGACCGGCCGGGCGCTTTGACCAACGAC   |      |      |      |            |
| 9-06-4fCter-katG  | (210)  | GGCACCAAACACGGTGTGTTACCGACCGGCCGGGCGCTTTGACCAACGAC   |      |      |      |            |
|                   |        |                                                      |      |      |      | Section 40 |
|                   | (1990) | 1990                                                 | 2000 | 2010 | 2020 | 2030 2040  |
| Msmeg-katG-coding | (1990) | TTCTTCGTCAACCTGCTCGACATGGGCACCGAGTGGAAGACCTCGGAGACG  |      |      |      |            |
| 9-06-2-4fkatG     | (262)  | TTCTTCGTCAACCTGCTCGACATGGGCACCGAGTGGAAGACCTCGGAGACG  |      |      |      |            |
| 9-06-4fCter-katG  | (261)  | TTCTTCGTCAACCTGCTCGACATGGGCACCGAGTGGAAGACCTCGGAGACG  |      |      |      |            |
|                   |        |                                                      |      |      |      | Section 41 |
|                   | (2041) | 2041                                                 | 2050 | 2060 | 2070 | 2080 2091  |
| Msmeg-katG-coding | (2041) | ACGGAGAACGTCTACGAGGGAGTCGATCGCAAGACCGGACAGTTGAAGTGG  |      |      |      |            |
| 9-06-2-4fkatG     | (313)  | ACGGAGAACGTCTACGAGGGAGTCGATCGCAAGACCGGACAGTTGAAGTGG  |      |      |      |            |
| 9-06-4fCter-katG  | (312)  | ACGGAGAACGTCTACGAGGGAGTCGATCGCAAGACCGGACAGTTGAAGTGG  |      |      |      |            |
|                   |        |                                                      |      |      |      | Section 42 |
|                   | (2092) | 2092                                                 | 2100 | 2110 | 2120 | 2130 2142  |
| Msmeg-katG-coding | (2092) | ACCGCGACCGCGAATGACCTTGTGTTCTGGGTCACATTCGGTGCTGCGTGCC |      |      |      |            |
| 9-06-2-4fkatG     | (364)  | ACCGCGACCGCGAATGACCTTGTGTTCTGGGTCACATTCGGTGCTGCGTGCC |      |      |      |            |
| 9-06-4fCter-katG  | (363)  | ACCGCGACCGCGAATGACCTTGTGTTCTGGGTCACATTCGGTGCTGCGTGCC |      |      |      |            |

|                   |        |                                                      |             |             |             |             |             |
|-------------------|--------|------------------------------------------------------|-------------|-------------|-------------|-------------|-------------|
|                   |        |                                                      |             |             |             |             | Section 43  |
|                   | (2143) | <u>2143</u>                                          | <u>2150</u> | <u>2160</u> | <u>2170</u> | <u>2180</u> | <u>2193</u> |
| Msmeg-katG-coding | (2143) | GTGGCCGAGGTTTATGCCCAGTCCGACAACGGCGAACGGTTCGTCAACGAC  |             |             |             |             |             |
| 9-06-2-4fkatG     | (415)  | GTGGCCGAGGTTTATGCCCAGTCCGACAACGGCGAACGGTTCGTCAACGAC  |             |             |             |             |             |
| 9-06-4fCter-katG  | (414)  | GTGGCCGAGGTTTATGCCCAGTCCGACAACGGCGAACGGTTCGTCAACGAC  |             |             |             |             |             |
|                   |        |                                                      |             |             |             |             | Section 44  |
|                   | (2194) | <u>2194</u>                                          | <u>2200</u> | <u>2210</u> | <u>2220</u> | <u>2230</u> | <u>2244</u> |
| Msmeg-katG-coding | (2194) | TTCGTCAAGGCCTGGGTCAAGGTCATGAACAACGACCGGTTTCGACCTCAAG |             |             |             |             |             |
| 9-06-2-4fkatG     | (466)  | TTCGTCAAGGCCTGGGTCAAGGTCATGAACAACGACCGGTTTCGACCTCAAG |             |             |             |             |             |
| 9-06-4fCter-katG  | (465)  | TTCGTCAAGGCCTGGGTCAAGGTCATGAACAACGACCGGTTTCGACCTCAAG |             |             |             |             |             |
|                   |        |                                                      |             |             |             |             | Section 45  |
|                   | (2245) | <u>2245</u>                                          | <u>2248</u> |             |             |             |             |
| Msmeg-katG-coding | (2245) | TAA                                                  | -           |             |             |             |             |
| 9-06-2-4fkatG     | (517)  | TAA                                                  | A           |             |             |             |             |
| 9-06-4fCter-katG  | (516)  | TAA                                                  | A           |             |             |             |             |
